# Supplementary material for: Evaluating the impact of decontamination interventions performed in sequence for mass casualty chemical incidents
Source: Research Square preprint supplement (doi:10.21203/rs.3.rs-373547/v1), 2021-03-29
Supplement: Supplementary file 1 [file d0f7a204335d468637230f98.docx]

**Evaluating the impact of decontamination interventions performed in sequence for mass casualty chemical incidents. Supplementary data**

Samuel Collins1*,Natalie Williams2, Felicity Southworth2, Thomas James1, Louise Davidson2, Emily Orchard2, Tim Marczylo3, & Richard Amlôt2,4

1 Chemicals and Environmental Effects Department, Centre for Radiation, Chemicals and Environmental Hazards, Public Health England, Didcot, Oxfordshire, UK

2 Behavioural Science Team, Emergency Response Department Science & Technology, Health Protection Directorate, Public Health England, UK

3 Toxicology Department, Centre for Radiation, Chemicals and Environmental Hazards, Public Health England, Didcot, Oxfordshire, UK

4 Department of Psychological Medicine, Institute of Psychiatry, Psychology and Neuroscience, King's College London, UK

*Corresponding author:

Samuel Collins, Chemicals and Environmental Effects Department, Centre for Radiation, Chemical and Environmental Hazards, Public Health England, Didcot, Oxfordshire, UK. Samuel.collins@phe.gov.uk

**Table S1:** Volunteer and study characteristics (min-max, **mean**, (SD)).

| **Decontamination Condition** | | | | | | |
| --- | --- | --- | --- | --- | --- | --- |
|  | | 1 – Control  (N = 11) | 2 – Dry + Interim  (N = 11) | 3 – Wet + Interim  (N = 11) | 4 –Dry + Interim + SOR (N = 11) | 5 –Wet + Interim + SOR (N = 11) |
| Participant age (years) | | *23 – 56,* ***35.83*** *(10.75)* | | | | |
| Ambient temperature (°C) | | ***23.32*** *(2.24)* | ***20.83*** *(2.32)* | ***21.58*** *(2.77)* | ***22.9*** *(2.2)* | ***21.26*** *(2.14)* |
| Quantity of white roll used for dry decontamination (no of sheets) | | *-* | *3-20,* ***10*** *(4.95)* | *-* | *3-20,* ***9.83*** *(5.52)* | *-* |
| Time spent dry decontaminating (mm:ss) | | *-* | *01:56-03:03,* ***02:40*** *(00:22)* | *-* | *01:42-03:05,* ***02:25*** *(00:21)* | *-* |
| Water temperature (°C) | Wet | *-* | *-* | *19.1-26.8,* ***22.95*** *(1.71)* | - | *19.7-25.4,* ***22.1*** *(1.72)* |
| Interim | *-* | *14.9-21.6,* ***17.49*** *(2.18)* | *15.1-20.9,* ***18.48*** *(1.77)* | *11.8-21.1,* ***17.7*** *(2.98)* | *17-19.9,* ***18.31*** *(0.98)* |
| SOR | *-* | *-* | *-* | *27.1-37.0,* ***29.0*** *(3.29)* | *25.1-31.2,* ***28.66*** *(2.23)* |

**Figure S1:** Schematic representation of the simulant application sites.

**
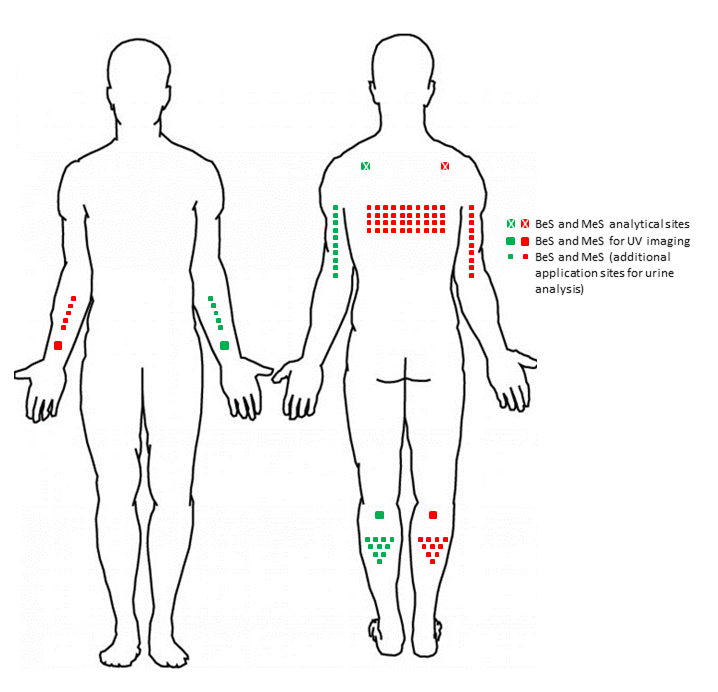
**

**Figure S2:** Schematic representation of the study protocol

**
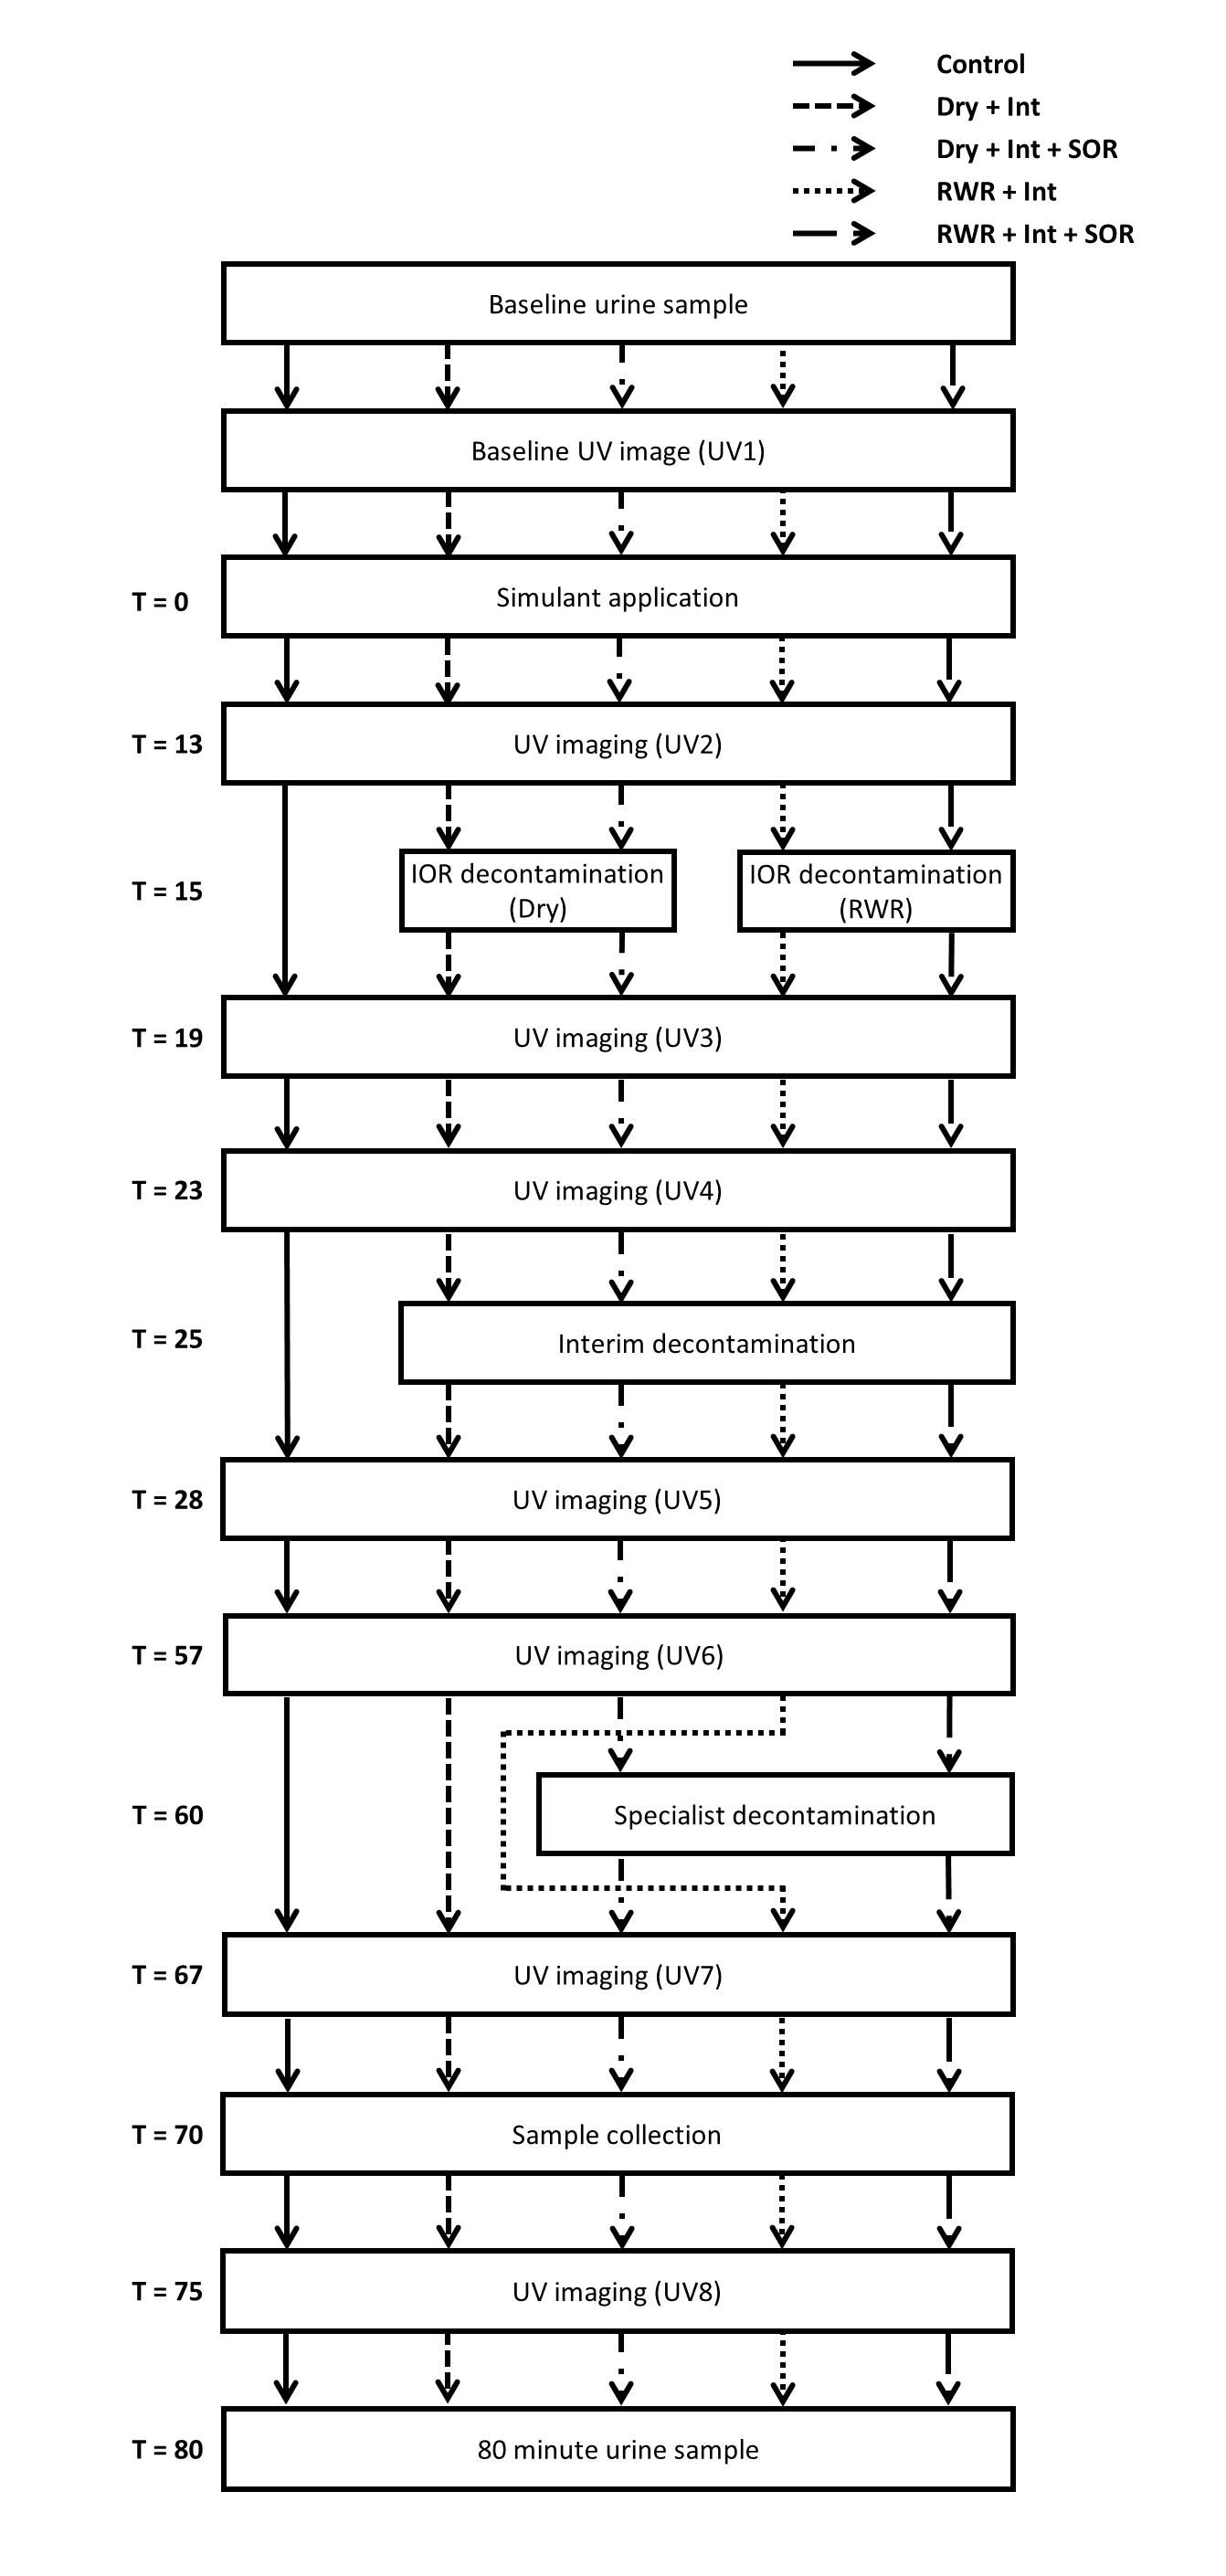
**
